# Supplementary material
Source: MDPI journal article supplement (https://www.mdpi.com/2624-845X/2/1/2)
Supplement: s1 [file s1]

## Supplementary Materials:

A.

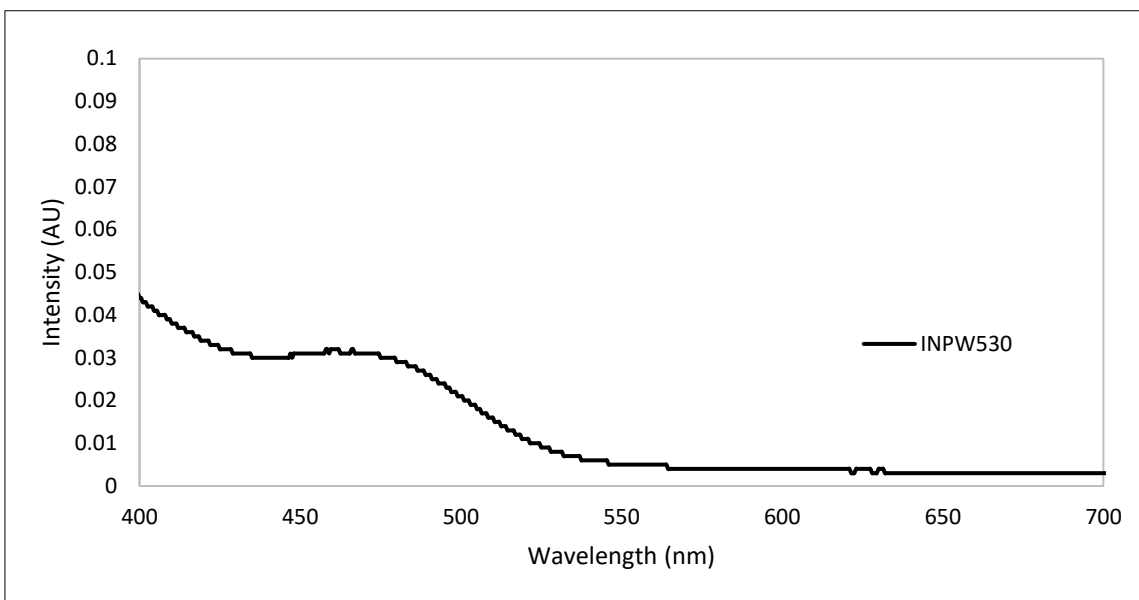

B.

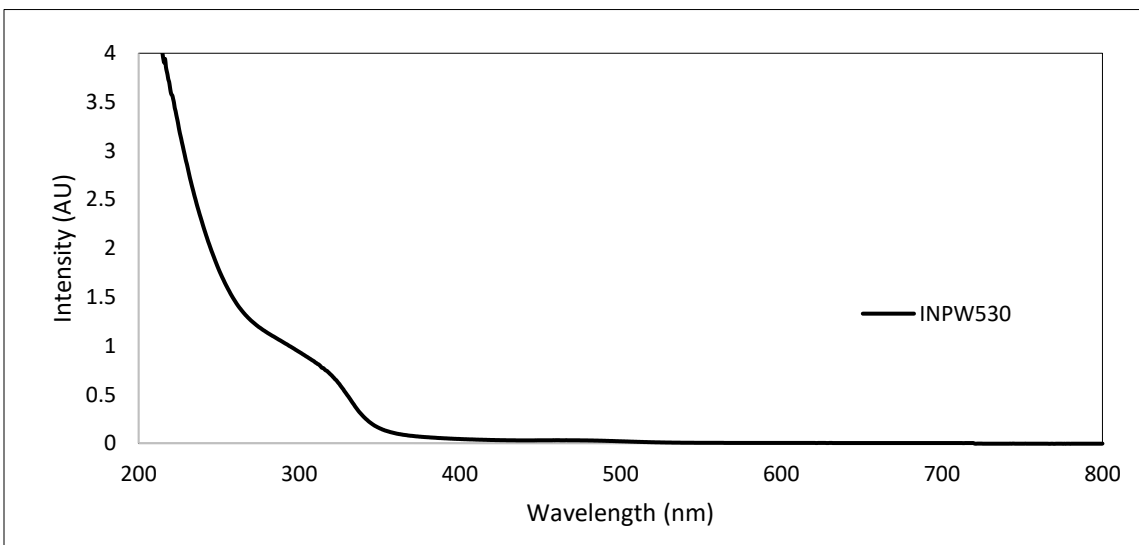

**Figure S1.** UV-Vis absorption spectra of INPW530 (a) Full spectra; (b) Spectra for wavelength range of 400 to 700nm. UV-Vis absorption spectrum was recorded by a Shimadzu UV3600 UV-Vis-NIR Spectrometer with scan range of 200 to 800nm and step size of 0.5nm. A sample was diluted to 0.1mg/mL by DI water. InP/ZnS showed no absorption at or above wavelengths of 650nm (a). The first absorption peak for InP/ZnS were around 470nm (b).

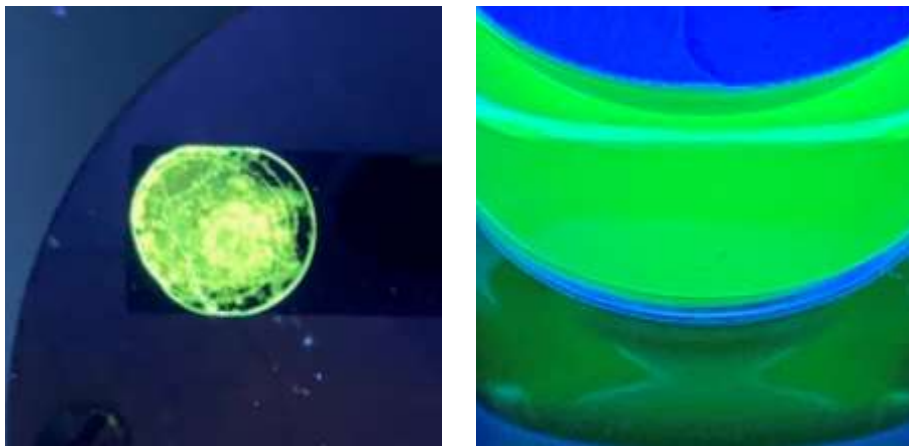

**Figure S2.** UV (365nm) light excitation of InP/ZnS QDs 530nm (green) on silicon substrates (left) and in liquid (right). The thick film of InP/ZnS QDs that were deposited onto silicon substrates were excited using a UV source at 365nm. Supp 2 shows the excitation at 530nm (Green).
